# Supplementary material for: Starvation Induced Cell Death in Autophagy-Defective Yeast Mutants Is Caused by Mitochondria Dysfunction
Source: PubMed Central journal article supplement (PMC3045454; doi:10.1371/journal.pone.0017412), 2011-02-25
Supplement: pone.0017412.s006.pdf [file pone.0017412.s006.pdf]

**Table S1**

| Strain  | Genotype                                                                                           | Source     |
|---------|----------------------------------------------------------------------------------------------------|------------|
| SEY6210 | <i>MATa leu2 ura3 his3 trp1 lys2 suc2-Δ9</i>                                                       | (1)        |
| SHY2    | SEY6210; <i>atg1::kanMX4</i>                                                                       | This study |
| SHY3    | SEY6210; <i>atg11::kanMX4</i>                                                                      | This study |
| SHY29   | SEY6210; <i>atg8::GFPplus-ATG8::hphNT1 vph1::VPH1-mCherry::kanMX4</i>                              | This study |
| SHY46   | SEY6210; <i>atg8::GFPplus-ATG8::hphNT1 vph1::VPH1-mCherry::kanMX4 atg1::natNT2</i>                 | This study |
| SHY58   | SEY6210; <i>atg7:: natNT2</i>                                                                      | This study |
| SHY70   | SEY6210; <i>atg2::kanMX4</i>                                                                       | This study |
| SHY75   | SEY6210; <i>atg15::hphNT1</i>                                                                      | This study |
| SHY80   | SEY6210; <i>his3Δ1::GPD<sup>p</sup>-mito-mCherry::CgHIS3</i>                                       | This study |
| SHY81   | SEY6210; <i>his3Δ1::GPD<sup>p</sup>-mito-mCherry::CgHIS3</i>                                       | This study |
| SHY86   | SEY6210; <i>rho<sup>0</sup></i>                                                                    | This study |
| SHY94   | SEY6210; <i>rho<sup>0</sup> atg1::kanMX4</i>                                                       | This study |
| SHY139  | SEY6210; <i>cta1::CTA1-3xFLAG::kanMX4</i>                                                          | This study |
| SHY140  | SEY6210; <i>cta1::CTA1-3xFLAG::kanMX4 atg1::natNT2</i>                                             | This study |
| SHY141  | SEY6210; <i>ctt1::CTT1-3xFLAG::kanMX4</i>                                                          | This study |
| SHY142  | SEY6210; <i>ctt1::CTT1-3xFLAG::kanMX4 atg1::natNT2</i>                                             | This study |
| SHY193  | SEY6210; <i>rho<sup>0</sup> atg8::GFPplus-ATG8::hphNT1 vph1::VPH1-mCherry::kanMX4</i>              | This study |
| SHY194  | SEY6210; <i>rho<sup>0</sup> atg8::GFPplus-ATG8::hphNT1 vph1::VPH1-mCherry::kanMX4 atg1::natNT2</i> | This study |
| SHY196  | SEY6210; <i>atg32::hphNT1</i>                                                                      | This study |

1. Robinson JS, Klionsky DJ, Banta LM, Emr SD (1988) Protein sorting in *Saccharomyces cerevisiae*: isolation of mutants defective in the delivery and processing of multiple vacuolar hydrolases. *Mol Cell Biol* 8: 4936-48.
